# Supplementary material
Source: MDPI journal article supplement (https://www.mdpi.com/search?q=molecules-24-02308)
Supplement: s001 [file molecules-24-02308-s001.pdf]

## *Supplementary Materials*

# **Novel cobalt dichloride complexes with hindered diphenylphosphine ligands: synthesis, characterization and behavior in the polymerization of butadiene**

Giovanni Ricci<sup>1\*</sup>, Giuseppe Leone<sup>1</sup>, Ivana Pierro<sup>1</sup>, Giorgia Zanchin<sup>1</sup>, Alessandra Forni<sup>2</sup>

<sup>1</sup> CNR-Istituto per lo Studio delle Macromolecole (ISMAC), via A. Corti 12, 20133 Milano, Italy; giuseppe.leone@ismac.cnr.it (G.L.); ivana.pierro@ismac.cnr.it (I.P.); giorgia.zanchin@ismac.cnr.it (G.Z.)

<sup>2</sup> CNR-Istituto di Scienze e Tecnologie Molecolari (ISTM), via C. Golgi 19, 20133 Milano, Italy; alessandra.forni@istm.cnr.it (A.F.)

\* Correspondence: giovanni.ricci@ismac.cnr.it (G.R.)

---

### **Table of Contents**

**Figures S1–S6.** <sup>13</sup>C NMR spectra (olefinic region) of the obtained poly(1,3-butadiene)s (Table 2 in the manuscript).

**Figures S7–S13.** FTIR spectra of the obtained poly(1,3-butadiene)s (Table 2 in the manuscript).

**Figures S14–S18.** X-ray powder spectra of some selected poly(1,3-butadiene)s (Table 2 in the manuscript).

**Figure S19.** FTIR spectrum of CoCl<sub>2</sub>(P<sup>t</sup>BuPh<sub>2</sub>)<sub>2</sub> (1).

**Figure S20.** FTIR spectrum of CoCl<sub>2</sub>[PPh<sub>2</sub>(NMDPP)]<sub>2</sub> (2).

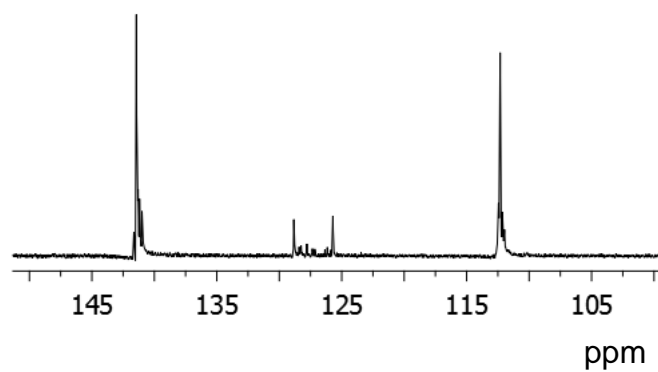

**Figure S1.** <sup>13</sup>C NMR spectrum (olefinic region) of the polybutadiene of Table 2, run 1.

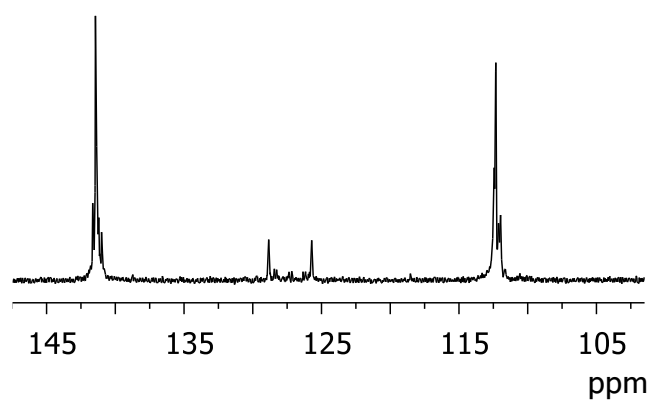

**Figure S2.** <sup>13</sup>C NMR spectrum (olefinic region) of the polybutadiene of Table 2, run 3.

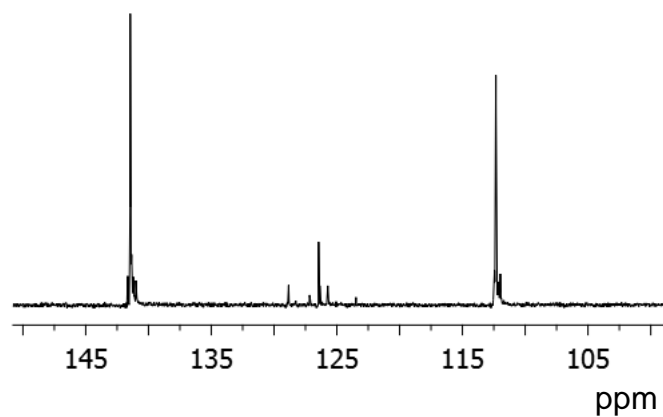

**Figure S3.** <sup>13</sup>C NMR spectrum (olefinic region) of the polybutadiene of Table 2, run 4.

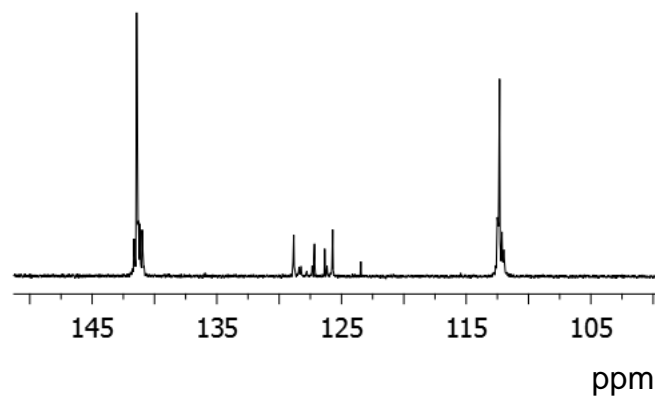

**Figure 4.**  $^{13}\text{C}$  NMR spectrum (olefinic region) of the polybutadiene of Table 2, run 5.

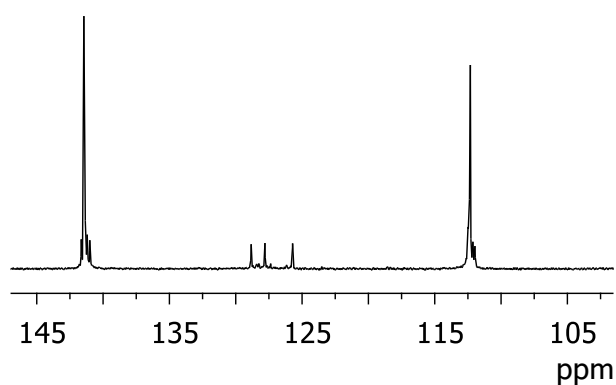

**Figure 5.**  $^{13}\text{C}$  NMR spectrum (olefinic region) of the polybutadiene of Table 2, run 6.

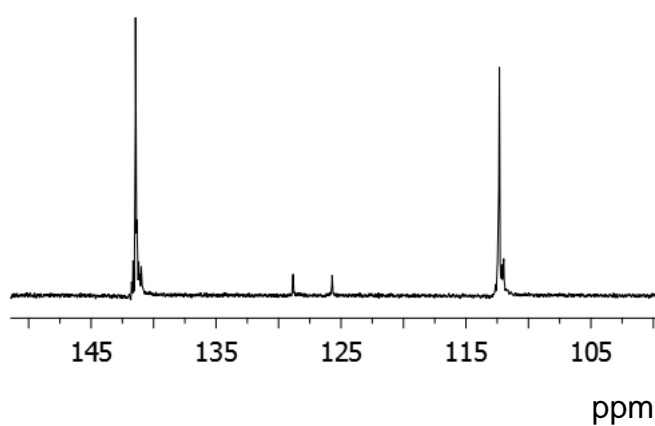

**Figure 6.**  $^{13}\text{C}$  NMR spectrum (olefinic region) of the polybutadiene of Table 2, run 7.

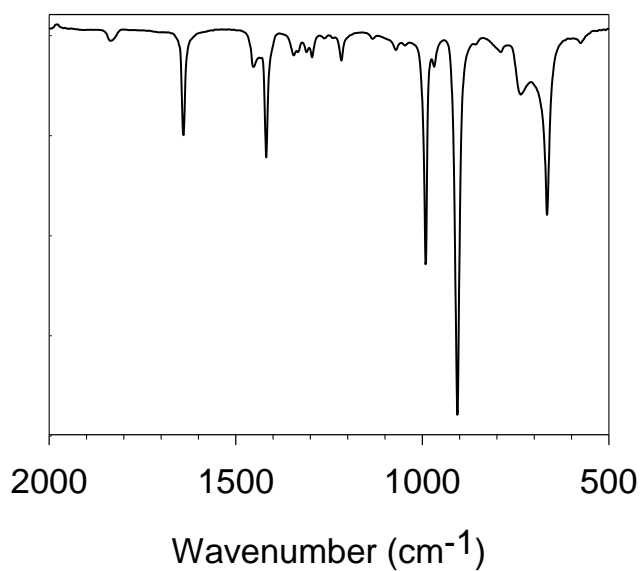

**Figure 7.** FTIR spectrum of the polybutadiene of Table 2, run 1.

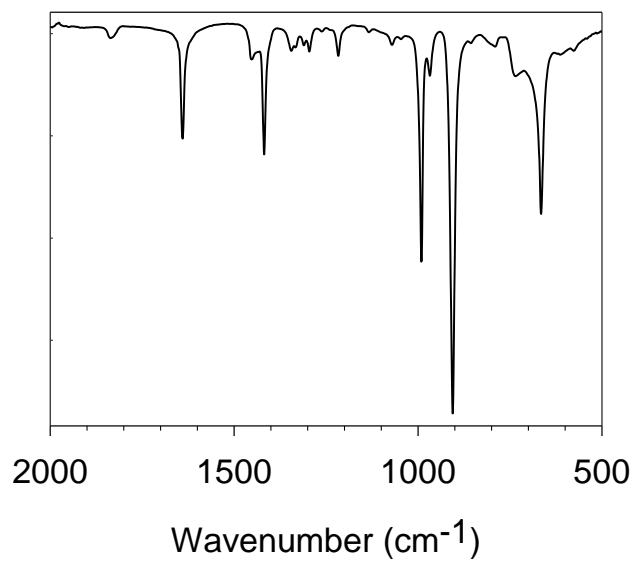

**Figure 8.** FTIR spectrum of the polybutadiene of Table 2, run 2.

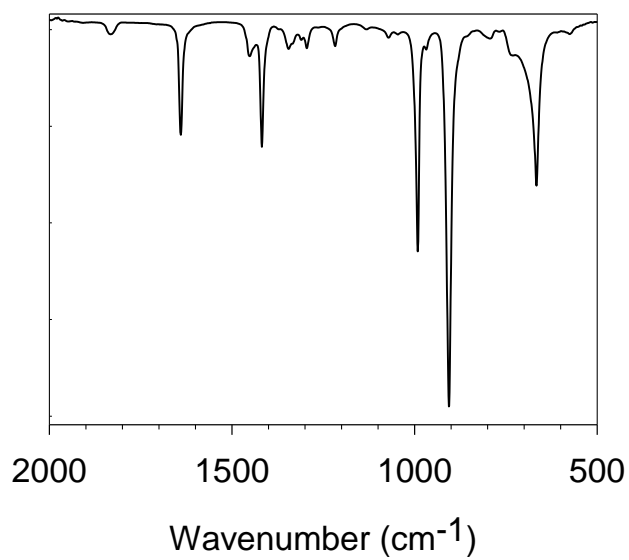

**Figure 9.** FTIR spectrum of the polybutadiene of Table 2, run 3.

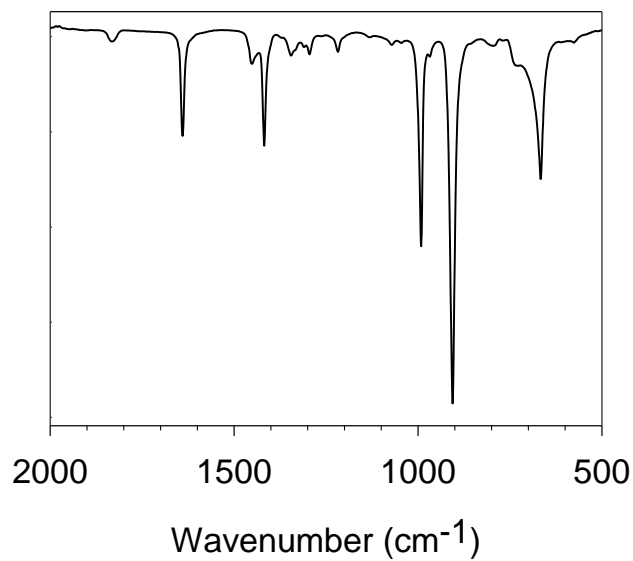

**Figure 10.** FTIR spectrum of the polybutadiene of Table 2, run 4.

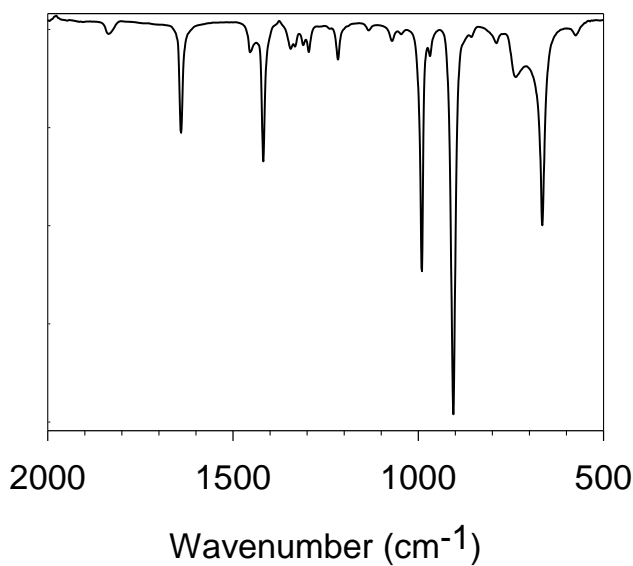

**Figure 11.** FTIR spectrum of the polybutadiene of Table 2, run 5.

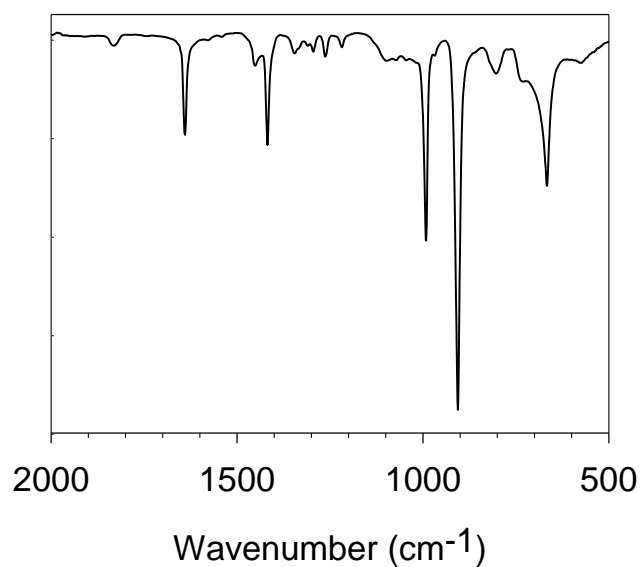

**Figure 12.** FTIR spectrum of the polybutadiene of Table 2, run 6.

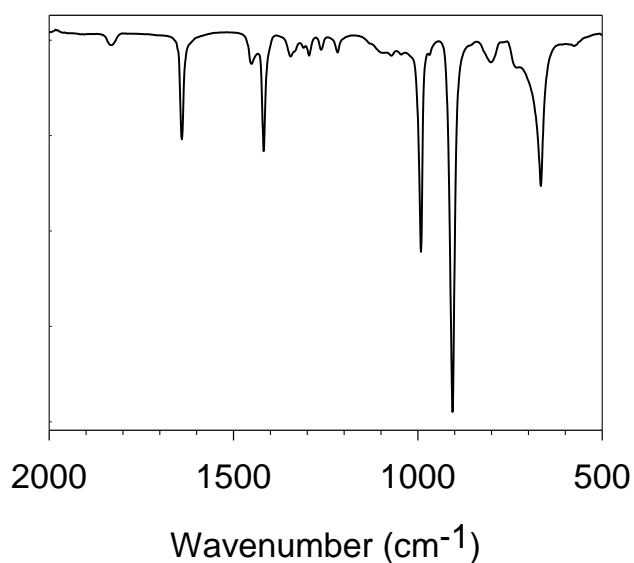

**Figure 13.** FTIR spectrum of the polybutadiene of Table 2, run 7.

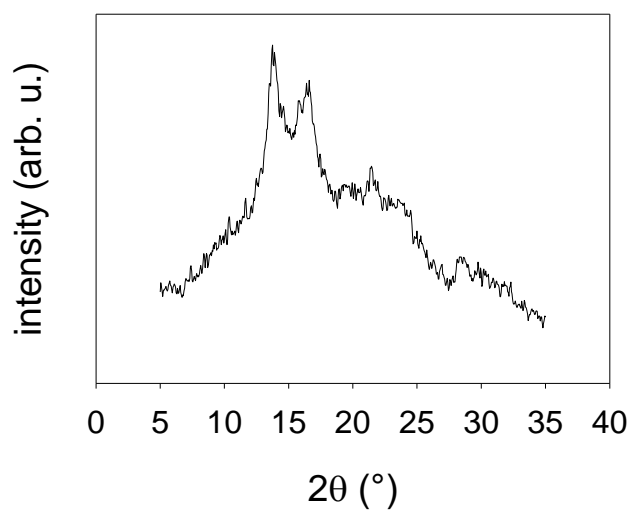

**Figure S14.** X-ray powder spectrum of the polybutadiene of Table 2, run 1

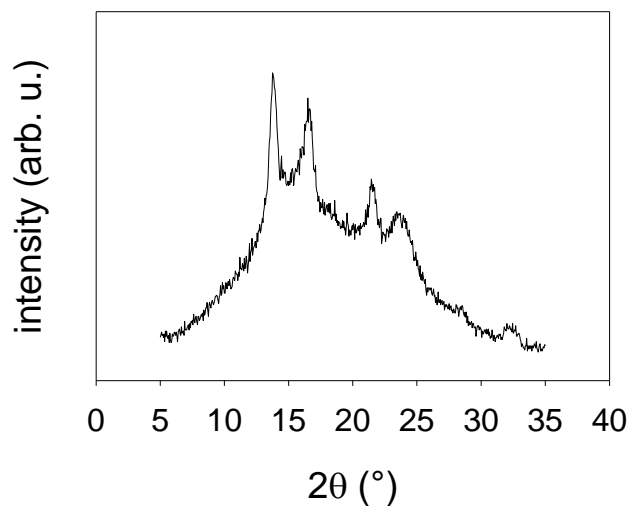

**Figure S15.** X-ray powder spectrum of the polybutadiene of Table 2, run 2.

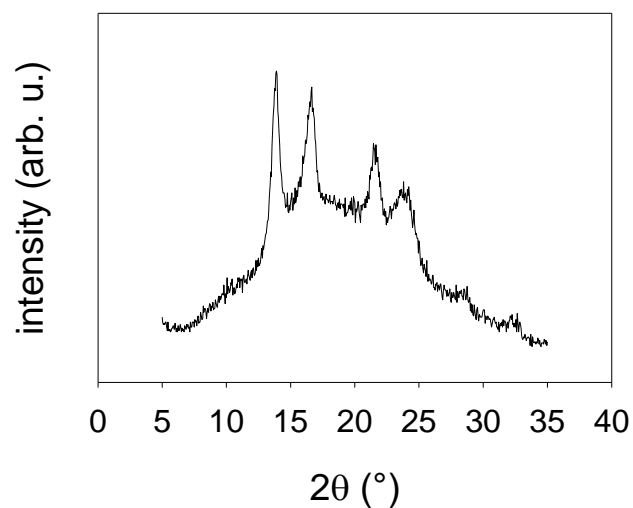

**Figure S16.** X-ray powder spectrum of the polybutadiene of Table 2, run 3.

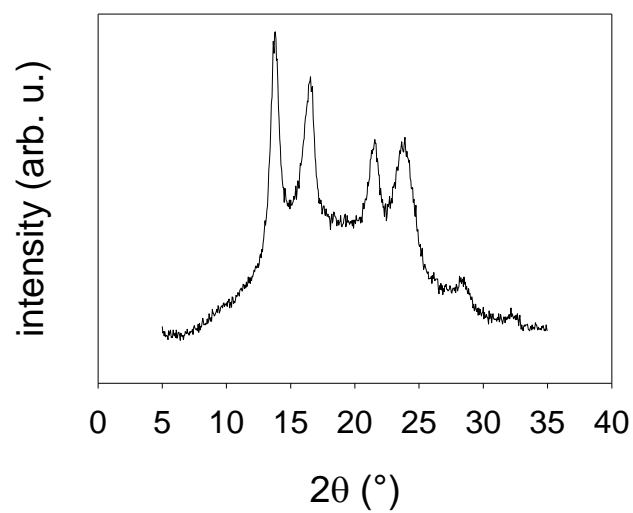

**Figure S17.** X-ray powder spectrum of the polybutadiene of Table 2, run 4.

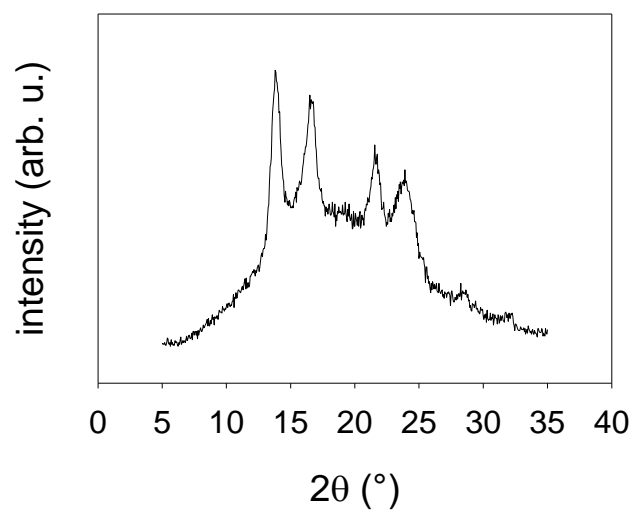

**Figure S18.** X-ray powder spectrum of the polybutadiene of Table 2, run 6.

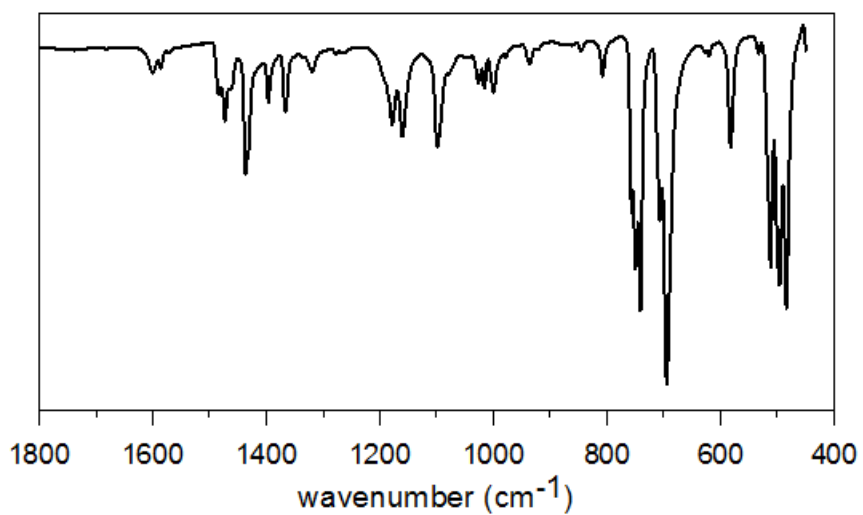

**Figure S19.** FTIR spectrum of  $\text{CoCl}_2(\text{P}^t\text{BuPh}_2)_2$  (**1**).

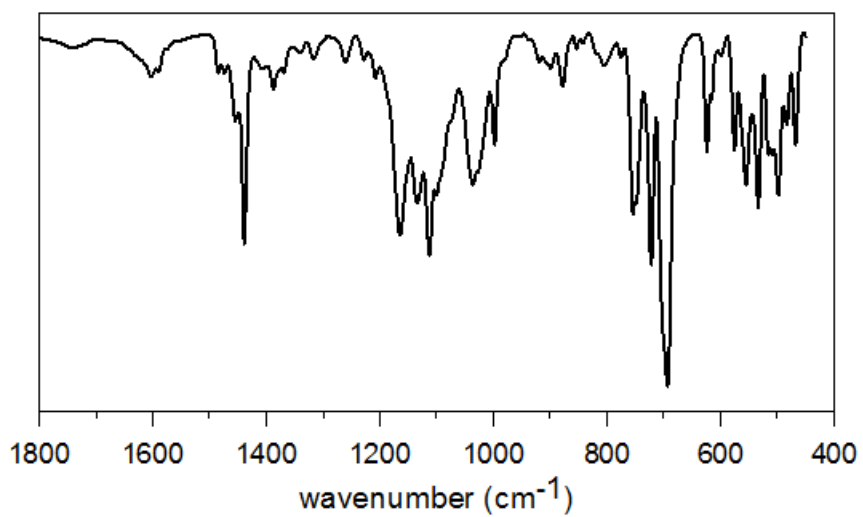

**Figure 20.** FTIR spectrum of  $\text{CoCl}_2[\text{PPh}_2(\text{NMDPP})]_2$  (**2**).
